# Supplementary material
Source: bioRxiv or medRxiv preprint supplement (https://medrxiv.org/highwire/filestream/72830/field_highwire_adjunct_files/0/2020.02.27.20028829-1.pdf)
Supplement: Supplementary file [file 2020.02.27.20028829-1.pdf]

| <b>Cluster name</b>             | <b>Cluster location</b>                                                            | <b>Cluster size</b> | <b>Number of Imported Cases linked to the cluster</b> | <b>Number of local cases linked to the cluster</b> | <b>Reporting date for the first case linked to cluster</b> | <b>Reporting date for the last case linked to cluster</b> |
|---------------------------------|------------------------------------------------------------------------------------|---------------------|-------------------------------------------------------|----------------------------------------------------|------------------------------------------------------------|-----------------------------------------------------------|
| Shinchunji Church of Jesus      | 81, Daemyeong-ro, Nam-gu, Daegu, Republic of Korea                                 | 597                 | 0                                                     | 597                                                | 2/18/2020                                                  | 2/26/2020                                                 |
| Chundo Daenam hospital          | 79-7, Cheonghwa-ro, Hwayang-eup, Cheongdo-gun, Gyeongsangbuk-do, Republic of Korea | 114                 | 0                                                     | 114                                                | 2/20/2020                                                  | 2/25/2020                                                 |
| Pilgrimage to Israel            | 31, Gunchong-gil, Uiseong-eup, Uiseong-gun, Gyeongsangbuk-do, Republic of Korea    | 31                  | 0                                                     | 31                                                 | 2/22/2020                                                  | 2/26/2020                                                 |
| Cluster A (Evacuees from Wuhan) | 110, Sejong-daero, Jung-gu, Seoul, Republic of Korea                               | 12                  | 1                                                     | 11                                                 | 1/26/2020                                                  | 2/21/2020                                                 |

Table S1: Characteristics of the largest clusters associated with COVID-19 outbreak in Korea as of February 26, 2020.
